# Supplementary material
Source: PubMed Central journal article supplement (PMC6352314)
Supplement: NIHMS1513231-supplement-2.pdf [file NIHMS1513231-supplement-2.pdf]

## Supplementary Table I

| Clinical variables      | FDR adjusted P-value | Spearman correlation coefficient |
|-------------------------|----------------------|----------------------------------|
| Nosocomial infection    | 0.0362               | 0.27                             |
| Multiple organ failure  | 0.0279               | -0.26                            |
| Time to recovery        | 0.0099               | -0.30                            |
| ICU length of stay      | 0.0084               | -0.28                            |
| Hospital length of stay | 0.0077               | -0.29                            |

**Supplementary Table I. Association between *FCER1A* expression in whole blood and clinical attributes in trauma patients at 7d after severe injury.** The data set was obtained from 167 severely injured patients and compared with 35 healthy subjects (ages 16-55) [<http://web.mgh.harvard.edu/TRT/>]
